# Supplementary material for: Vibrationally induced color shift tuning of photoluminescence in Ce3+-doped garnet phosphors
Source: Royal Society of Chemistry journal article supplement (doi:10.1039/c9tc01244c), 2019-01-01
Supplement: c9tc01244c1.pdf [file c9tc01244c1.pdf]

## Supporting information:

# Vibrationally induced color shift tuning of photoluminescence in $\text{Ce}^{3+}$ -doped garnet phosphors

Yuan-Chih Lin,<sup>a</sup> Paul Erhart<sup>b</sup> and Maths Karlsson<sup>\*a</sup>

<sup>a</sup>Department of Chemistry and Chemical Engineering, Chalmers University of Technology, SE-412 96 Göteborg, Sweden. E-mail: maths.karlsson@chalmers.se (Maths Karlsson); <sup>b</sup>Department of Physics, Chalmers University of Technology, SE-412 96 Göteborg, Sweden

## 1 Supporting figures

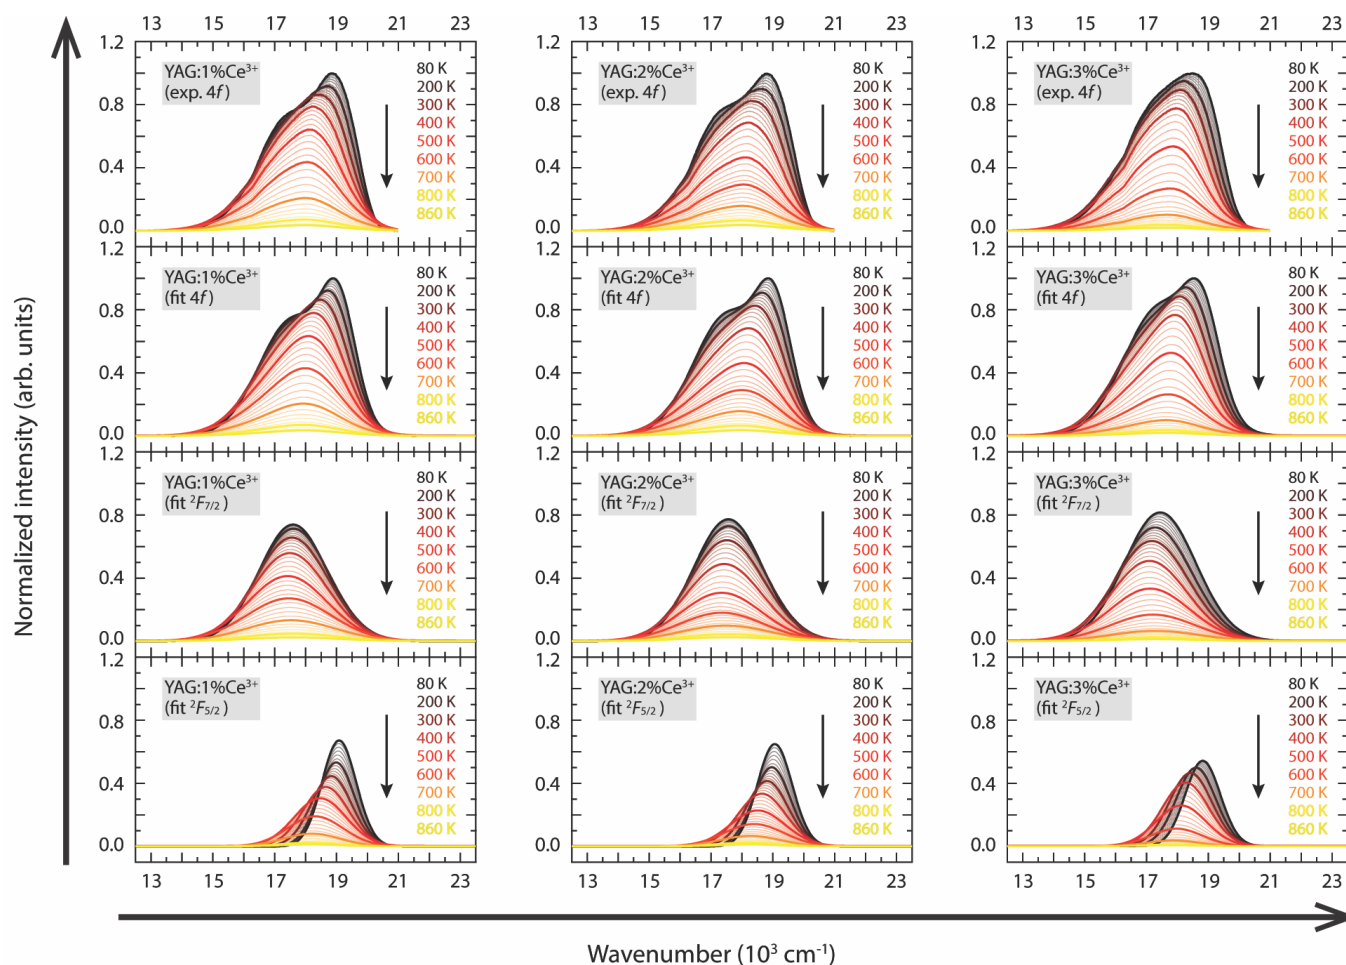

**Fig. S1** Variable temperature emission spectra, corresponding to the experimental  $4f$  bands and to the  $4f$ ,  ${}^2F_{7/2}$ , and  ${}^2F_{5/2}$  bands obtained from the fits, of  $\text{YAG:1\%Ce}^{3+}$ ,  $\text{YAG:2\%Ce}^{3+}$  and  $\text{YAG:3\%Ce}^{3+}$ .

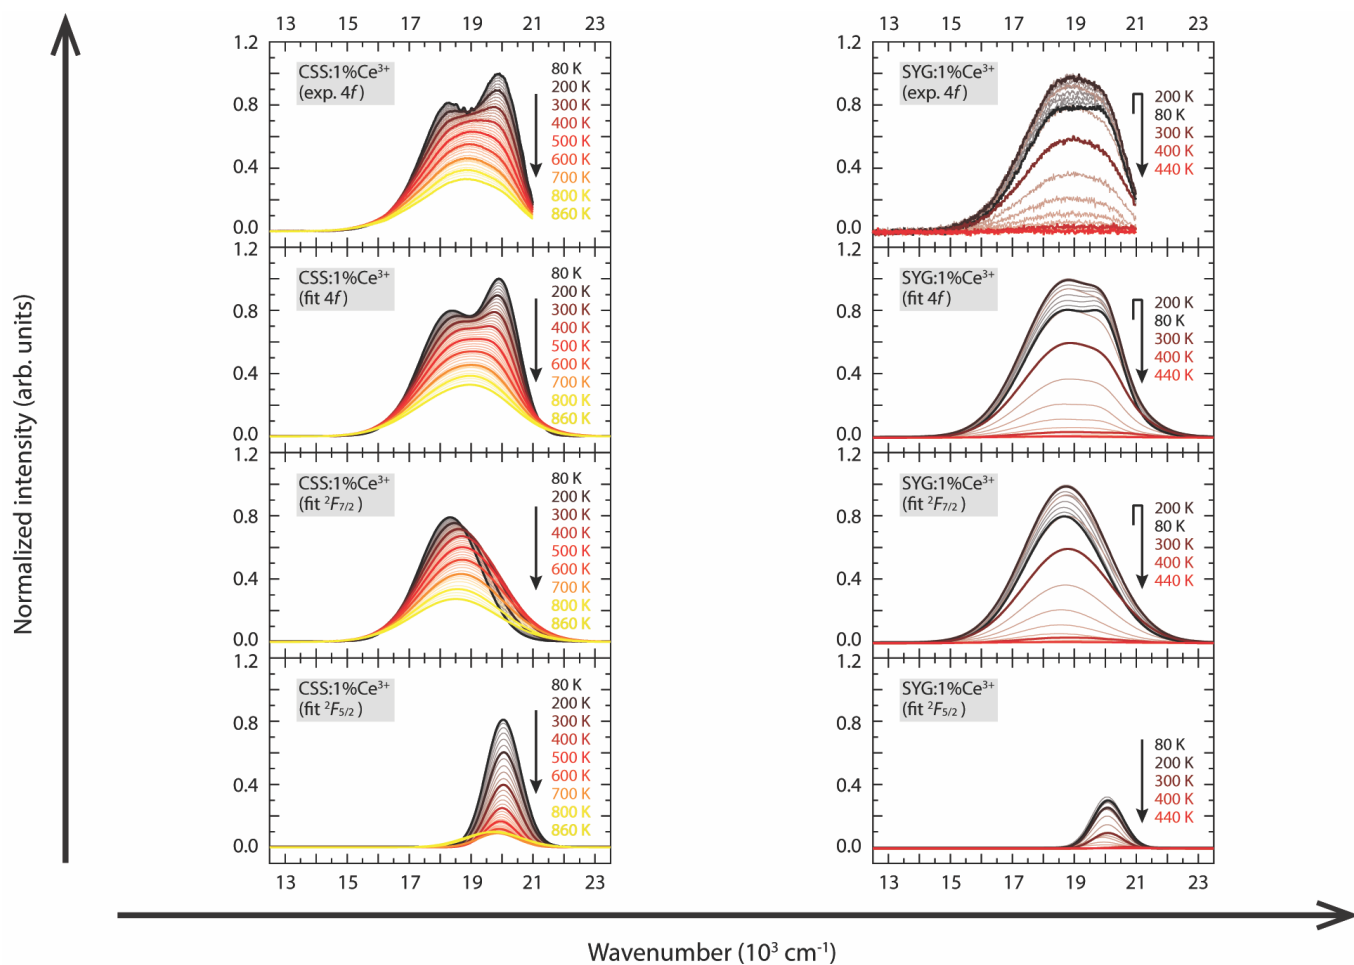

**Fig. S1 (continued)** Variable temperature emission spectra, corresponding to the experimental  $4f$  bands and to the  $4f$ ,  ${}^2F_{7/2}$ , and  ${}^2F_{5/2}$  bands obtained from the fits, of CSS:1%Ce<sup>3+</sup> and SYG:1%Ce<sup>3+</sup>.

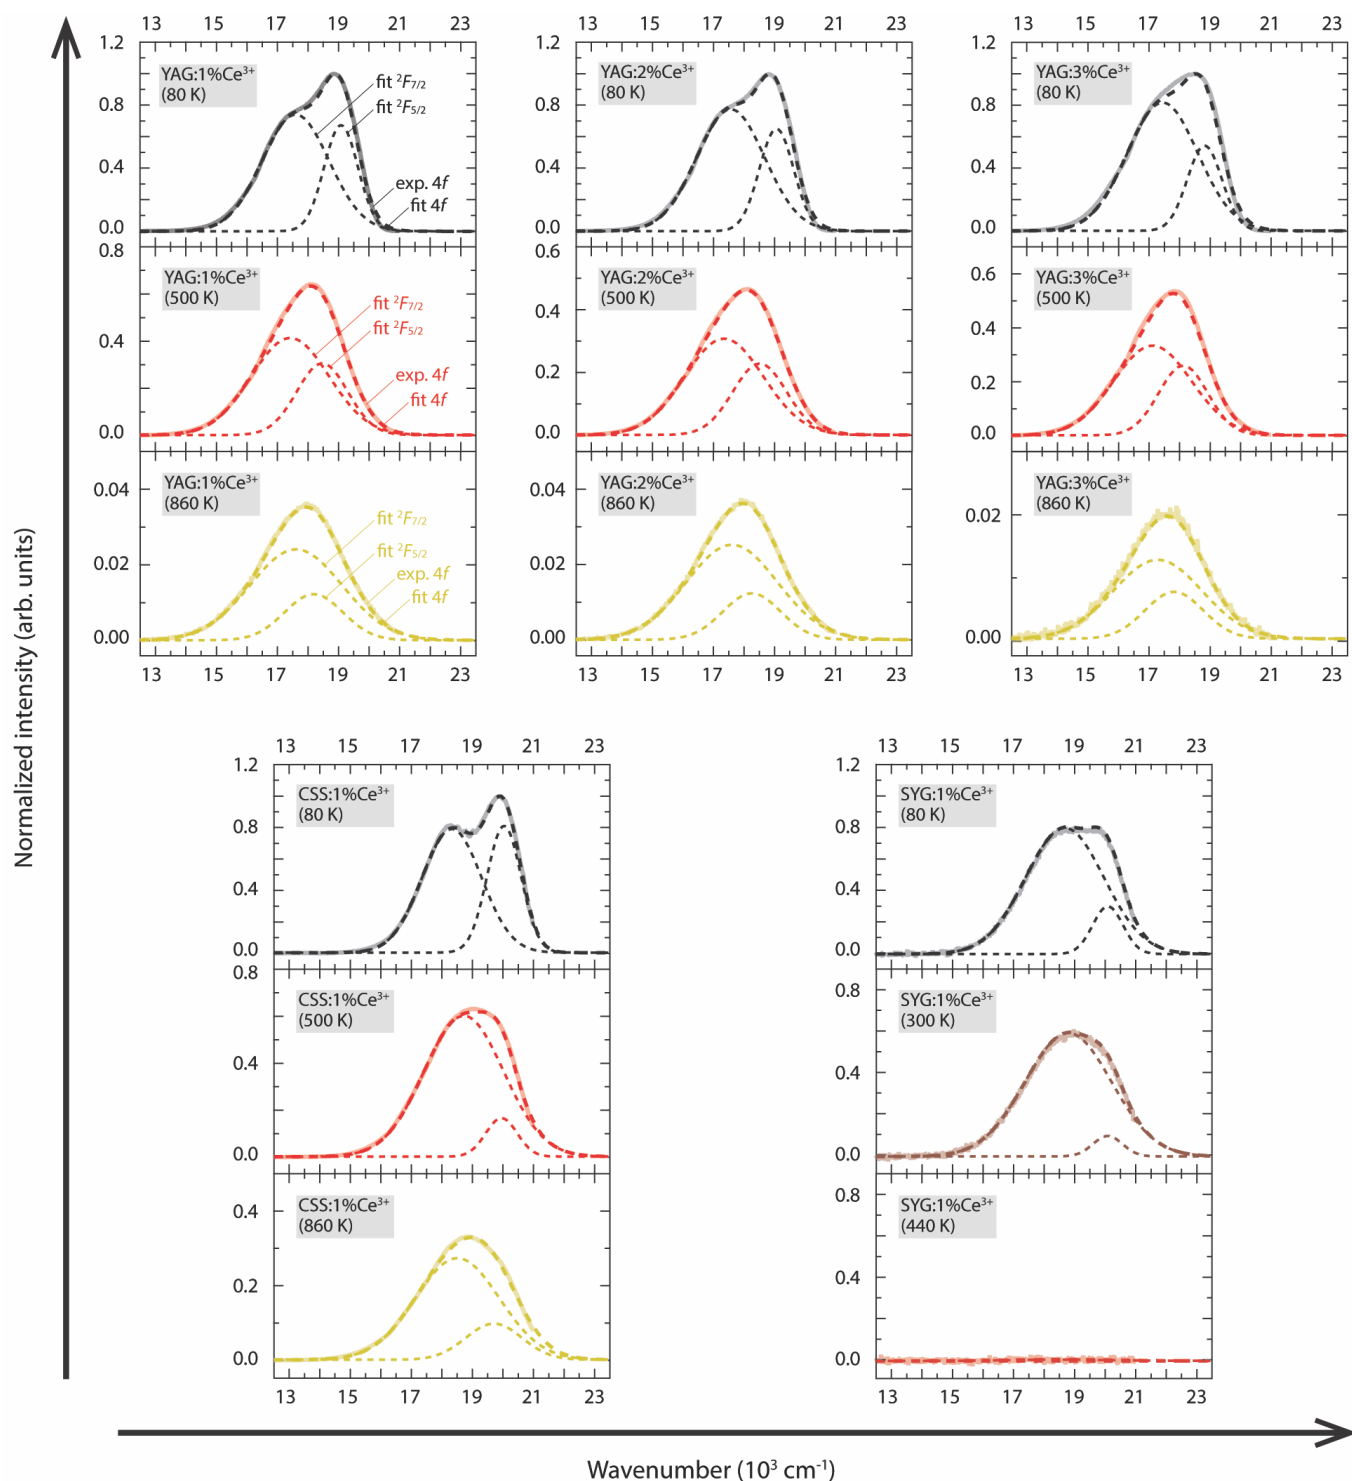

**Fig. S2** Deconvolution of the emission spectra of YAG:1%Ce<sup>3+</sup>, YAG:2%Ce<sup>3+</sup>, YAG:3%Ce<sup>3+</sup>, and CSS:1%Ce<sup>3+</sup> at 80, 500, and 860 K, respectively, and SYG:1%Ce<sup>3+</sup> at 80, 300, and 440 K, respectively. Solid curves and thicker dashed curves correspond to the  $5d_1 \rightarrow 4f$  emission band ( $4f$  band) obtained from the experimental (exp.) measurements and peak fits, respectively. The peak fits were performed using two Gaussian functions (*cf.* two thinner dashed curves) which correspond to the  $5d_1 \rightarrow {}^2F_{7/2}$  and  $5d_1 \rightarrow {}^2F_{5/2}$  emission bands ( ${}^2F_{7/2}$  and  ${}^2F_{5/2}$  bands, centered at lower and higher energies, respectively).
